# Supplementary material for: Survival Time of Cross‐Match Incompatible Red Blood Cells in Adult Horses
Source: PubMed Central journal article supplement — J Vet Intern Med. 2015 Oct 18;29(6):1683–8. doi: 10.1111/jvim.13627 (PMC4895677; doi:10.1111/jvim.13627), 2015-10-18
Supplement: JVIM-29-1683-s001.pdf [file JVIM-29-1683-s001.pdf]

Supplementary Table 1: Donor-recipient pairings by blood type. Pairs 1-2 were compatible and pairs 3-10 were incompatible by cross-match. A = Agglutination, scale 0-4+; H = Hemolysin, - or +. The major crossmatch of the donor is the minor cross-match for the recipient.

| Horse       | A  | C  | K  | P  | Q    | U  | Major Crossmatch | Pre-transfusion antibodies  | 28d post-transfusion new antibodies |
|-------------|----|----|----|----|------|----|------------------|-----------------------------|-------------------------------------|
| Donor 1     | Aa | Ca |    |    |      |    | A: 0<br>H: -     | None                        | -                                   |
| Recipient 1 | Aa | Ca |    |    |      |    | A: 0<br>H: -     | None                        | A: Un-identified<br>H: None         |
| Donor 2     | Aa | Ca |    |    | Qabc |    | A: 0<br>H: -     | None                        | -                                   |
| Recipient 2 | Aa | Ca |    |    | Qabc |    | A: 0<br>H: -     | None                        | None                                |
| Donor 3     | Aa | Ca |    |    | Qabc |    | A: 0<br>H: -     | None                        | -                                   |
| Recipient 3 | Aa | Ca |    |    | Qabc |    | A: 1+<br>H: -    | A: Un-identified<br>H: None | None                                |
| Donor 4     | Aa | Ca |    | Pa | Qabc |    | A: 0<br>H: -     | None                        | -                                   |
| Recipient 4 | Aa | Ca | Ka | Pa |      | Ua | A: 2+<br>H: -    | A: Un-identified<br>H: None | None                                |
| Donor 5     | Aa | Ca | Ka |    | Qabc |    | A: 0<br>H: -     | None                        | -                                   |
| Recipient 5 | Aa |    |    |    |      | Ua | A: 4+<br>H: +    | A: Anti-Ca<br>H: Anti-Ca    | None                                |
| Donor 6     | Aa | Ca |    |    | Qabc | Ua | A: 0<br>H: -     | A: anti-donkey<br>H: None   | -                                   |
| Recipient 6 | Aa |    |    |    | Qabc |    | A: 4+<br>H: +    | A: Anti-Ca<br>H: Anti-Ca    | None                                |

|              |     |    |    |    |      |    |               |                                          |      |
|--------------|-----|----|----|----|------|----|---------------|------------------------------------------|------|
| Donor 7      | Aa  | Ca |    |    | Qabc | Ua | A: 0<br>H: -  | None                                     | -    |
| Recipient 7  | Aa  |    |    |    | Qabc |    | A: 4+<br>H: + | A: Anti-Ca<br>H: Anti-Ca                 | None |
| Donor 8      | Aa  | Ca |    |    | Qabc | Ua | A: 0<br>H: -  | A: anti-donkey<br>H: None                | -    |
| Recipient 8  | Aa  |    |    |    | Qabc |    | A: 4+<br>H: + | A: Anti-Ca<br>H: Anti-Ca                 | None |
| Donor 9      | Aa  | Ca | Ka |    | Qabc | Ua | A: 0<br>H: -  | None                                     | -    |
| Recipient 9  | Aab |    |    |    |      |    | A: 4+<br>H: + | A: Anti-Ca,<br>Anti-donkey<br>H: Anti-Ca | None |
| Donor 10     | Aab | Ca |    | Pa |      | Ua | A: 0<br>H: -  | None                                     | -    |
| Recipient 10 | Aa  |    |    |    | Qabc |    | A: 4+<br>H: + | A: Anti-Ca<br>H: Anti-Ca                 | None |
